# Supplementary material for: Collateral Circulation and BNP in Predicting Outcome of Acute Ischemic Stroke Patients with Atherosclerotic versus Cardioembolic Cerebral Large-Vessel Occlusion Who Underwent Endovascular Treatment
Source: MDPI journal article supplement (doi:10.3390/brainsci13040539), 2023-03-24
Supplement: s1 [file s1]

**Table S1. CE stroke Patient Characteristics at Baseline**

| Characteristic                       | All patients<br>(n=77)    | Good outcome<br>(n=29)    | Poor outcome<br>(n=48)    | <i>P</i> Value |
|--------------------------------------|---------------------------|---------------------------|---------------------------|----------------|
| Age, y; median<br>(IQR)              | 81.00 (71.50,<br>86.00)   | 80.00 (70.00,<br>80.00)   | 81.00 (72.00,<br>85.00)   | 0.595          |
| Female, n (%)                        | 41 (54.25)                | 15 (36.59)                | 26 (63.41)                | 1.000          |
| NIHSS, median<br>(IQR)               | 15.00 (10.00,<br>20.00)   | 11.00 (7.00,<br>15.00)    | 16.00 (13.00,<br>22.00)   | 0.003          |
| IV-Tpa, n (%)                        | 22 (28.57)                | 8 (27.59)                 | 14 (29.17)                | 1.000          |
| SBP                                  | 147.00<br>(136.00,162.50) | 147.00<br>(135.00,154.00) | 150.00<br>(136.00,166.00) | 0.414          |
| DBP                                  | 80.00 (71.50,<br>93.50)   | 79.00 (70.00,<br>88.00)   | 80.00 (75.00,<br>98.00)   | 0.739          |
| Risk factors, n (%)                  |                           |                           |                           |                |
| Smoking                              | 15 (19.48)                | 8 (27.59)                 | 7 (14.58)                 | 0.235          |
| AF                                   | 69 (89.61)                | 26 (89.66)                | 43 (89.58)                | 1.000          |
| Hypertension                         | 62 (80.52)                | 25 (86.21)                | 37 (77.08)                | 0.387          |
| Diabetes<br>mellitus                 | 22 (28.57)                | 5 (17.24)                 | 17 (35.42)                | 0.120          |
| Hyperlipidemia                       | 34 (44.16)                | 12 (41.38)                | 22 (45.83)                | 0.814          |
| CHD                                  | 39 (50.65)                | 13 (44.83)                | 26 (54.17)                | 0.485          |
| Previous stroke                      | 35 (45.45)                | 10 (34.48)                | 25 (52.08)                | 0.161          |
| Imaging<br>examinations              |                           |                           |                           |                |
| IC volume, mL;<br>median (IQR)       | 39.52 (14.56,<br>80.77)   | 27.63 (7.80,<br>43.54)    | 54.63 (19.45,<br>129.24)  | 0.089          |
| IP volume, mL;<br>median (IQR)       | 92.73 (53.66,<br>158.19)  | 89.67<br>(18.76,169.20)   | 97.47<br>(78.44,140.11)   | 0.226          |
| MMR, median<br>(IQR)                 | 2.29 (1.41,<br>4.55)      | 3.54 (2.23, 7.20)         | 2.21 (1.07,<br>4.00)      | 0.006          |
| FIV, mL;<br>median (IQR)             | 39.44<br>(11.05,101.97)   | 14.00<br>(3.96,45.15)     | 113.36 (52.71,<br>245.90) | <0.001*        |
| ASPECTS,<br>median (IQR)             | 8.00 (5.00,<br>9.00)      | 8.00 (5.00, 8.00)         | 7.00 (4.00,<br>9.00)      | 0.268          |
| 4D CTA-CS<br>scores, median<br>(IQR) | 2.00 (1.00,<br>3.00)      | 3.00 (3.00, 4.00)         | 2.00 (0.00,<br>3.00)      | <0.001*        |
| CBS, median<br>(IQR)                 | 6.00 (2.50,<br>9.00)      | 6.00 (1.00, 9.00)         | 4.00 (3.00,<br>9.00)      | 0.332          |
| Thrombus<br>location, n (%)          |                           |                           |                           | 0.163          |
| ICA                                  | 22 (28.57)                | 9 (31.03)                 | 13 (27.08)                |                |

|                                        |                            |                            |                             |         |
|----------------------------------------|----------------------------|----------------------------|-----------------------------|---------|
| Segment M1                             | 33 (42.86)                 | 9 (31.03)                  | 24 (50.00)                  |         |
| Segment M2                             | 19 (24.68)                 | 10 (34.48)                 | 14 (18.75)                  |         |
| A1                                     | 1 (1.30)                   | 0 (0.00)                   | 1(3.45)                     |         |
| Tandem                                 | 2 (2.60)                   | 0 (0.00)                   | 2 (4.17)                    |         |
| occlusion                              |                            |                            |                             |         |
| Laboratory                             |                            |                            |                             |         |
| parameters                             |                            |                            |                             |         |
| Glucose,<br>mmol/L; median<br>(IQR)    | 7.20 (6.15,<br>8.25)       | 6.50 (5.60, 7.90)          | 7.60 (6.50,<br>8.90)        | 0.199   |
| Creatinine,<br>umol/L; median<br>(IQR) | 76.00 (66.00,<br>88.00)    | 72.00 (64.00,<br>80.00)    | 78.00 (66.00,<br>91.00)     | 0.582   |
| Urea,<br>mmol/L; median<br>(IQR)       | 5.64 (4.28,<br>7.18)       | 5.61 (4.52, 7.00)          | 5.64 (4.08,7.36)            | 0.099   |
| Uric acid,<br>mmol/L; median<br>(IQR)  | 324.00 (252.00,<br>409.25) | 317.00 (278.00,<br>362.00) | 345.00 (277.00,<br>456.00)  | 0.421   |
| Sodium,<br>mmol/L; median<br>(IQR)     | 140.00 (138.30,<br>141.15) | 140.10 (136.50,<br>141.00) | 140.00 (138.60,<br>141.90)  | 0.097   |
| Potassium,<br>mmol/L; median<br>(IQR)  | 4.00 (3.70,4.30)           | 4.10 (3.50,4.30)           | 4.00 (3.70,<br>4.20)        | 0.081   |
| D-dimer;<br>median (IQR)               | 456.00 (206.50,<br>914.00) | 219.00 (114.00,<br>446.00) | 509.00 (254.00,<br>1414.00) | <0.001* |
| Fibrinogen,<br>g/L; median<br>(IQR)    | 3.01 (2.62,<br>3.54)       | 3.05 (2.55, 3.62)          | 2.94 (2.65,<br>3.57)        | 0.232   |
| INR; median<br>(IQR)                   | 0.99 (0.95,<br>1.10)       | 1.03 (0.96, 1.10)          | 0.97 (0.94,<br>1.05)        | 0.012   |
| RBC; median<br>(IQR)                   | 4.30 (3.92,<br>4.78)       | 4.14 (3.95, 4.50)          | 4.51 (3.92,<br>4.86)        | 0.156   |
| WBC; median<br>(IQR)                   | 7.62 (5.91,9.64)           | 7.61 (6.07, 9.59)          | 7.73 (5.80,<br>9.80)        | 0.887   |
| BNP, median<br>(IQR)                   | 466.38 (252.33,<br>738.68) | 372.12 (180.66,<br>467.70) | 560.90 (337.00,<br>867.30)  | <0.001* |
| Time, min; median<br>(IQR)             |                            |                            |                             |         |
| Onset to<br>imaging                    | 191.00 (117.50,<br>294.00) | 161.00 (111.00,<br>271.00) | 191.00 (115.00,<br>288.00)  | 0.394   |
| Imaging to<br>puncture                 | 73.00 (55.50,<br>105.00)   | 70.00 (46.00,<br>107.00)   | 74.00 (60.00,<br>104.00)    | 0.345   |

|                            |                       |                      |                       |       |
|----------------------------|-----------------------|----------------------|-----------------------|-------|
| Puncture to recanalization | 67.00 (47.50, 100.50) | 61.00 (46.00, 90.00) | 79.00 (52.00, 120.00) | 0.101 |
| Recanalization, n (%)      | 64 (83.12)            | 26 (89.66)           | 38 (79.17)            | 0.349 |

---

CE: cardioembolic; IQR: interquartile range; NIHSS: National Institutes of Health Stroke Scale; SBP: systolic pressure; IV-Tpa: intravenous tissue type plasminogen activator; DBP: diastolic pressure; AF: atrial fibrillation; CHD: coronary heart disease; IC: ischemic core; IP: ischemic penumbra; MMR: mismatch ratio; FIV: final infarct volume; ASPECTS: Alberta Stroke Program Early CT Score; 4D CTA-CS: the modified collateral circulation scoring system on 4D CTA; CBS: clot burden score; ICA: internal carotid artery; M1: M1 segment middle cerebral artery; M2: M2 segment middle cerebral artery; A1: A1 segment anterior cerebral artery; INR: activated partial thromboplastin time; RBC: red blood cell; WBC: white blood cell; BNP: B-type brain natriuretic peptide

**Table S2. LAA stroke Patient Characteristics at Baseline**

| Characteristic                       | All patients<br>(n=105)   | Good outcome<br>(n=70)    | Poor outcome<br>(n=35)    | <i>P</i> Value |
|--------------------------------------|---------------------------|---------------------------|---------------------------|----------------|
| Age, y; median<br>(IQR)              | 76.00 (63.75,<br>83.25)   | 65.00 (55.00,<br>75.00)   | 81.00 (70.00,<br>85.00)   | <0.001*        |
| Female, n (%)                        | 38 (36.19)                | 19 (27.14)                | 19 (54.29)                | 0.009          |
| NIHSS, median<br>(IQR)               | 12.50 (7.00,<br>17.00)    | 9.00 (6.00,<br>13.25)     | 13.00 (9.00,<br>17.00)    | <0.001*        |
| IV-Tpa, n (%)                        | 21 (20.00)                | 19 (27.14)                | 2 (5.71)                  | 0.018          |
| SBP                                  | 145.00<br>(132.75,159.25) | 142.00<br>(128.75,150.50) | 144.00<br>(130.00,160.00) | 0.352          |
| DBP                                  | 80.00 (71.00,<br>90.00)   | 80.00 (71.75,<br>87.25)   | 80.00 (70.00,<br>89.00)   | 0.150          |
| Risk factors, n (%)                  |                           |                           |                           |                |
| Smoking                              | 38 (19.48)                | 29 (27.59)                | 9 (14.58)                 | 0.135          |
| AF                                   | 6 (5.71)                  | 0 (0.00)                  | 6 (17.14)                 | 0.001          |
| Hypertension                         | 78 (74.29)                | 49 (70.00)                | 29 (82.86)                | 0.236          |
| Diabetes<br>mellitus                 | 51 (48.57)                | 31 (44.29)                | 20 (57.14)                | 0.300          |
| Hyperlipidemia                       | 49 (46.67)                | 33 (47.14)                | 16 (45.71)                | 1.000          |
| CHD                                  | 40 (38.10)                | 20 (28.57)                | 20 (57.14)                | 0.427          |
| Previous stroke                      | 47 (44.76)                | 29 (41.43)                | 18 (51.42)                | 0.406          |
| Imaging<br>examinations              |                           |                           |                           |                |
| IC volume, mL;<br>median (IQR)       | 22.55 (8.99,<br>57.65)    | 27.63 (7.80,<br>43.54)    | 54.63 (19.45,<br>129.24)  | <0.001*        |
| IP volume, mL;<br>median (IQR)       | 82.94 (42.92,<br>128.05)  | 81.20<br>(33.40,122.95)   | 57.37 (35.50,<br>100.98)  | 0.168          |
| MMR, median<br>(IQR)                 | 3.04 (1.76,<br>6.25)      | 3.54 (2.31, 7.41)         | 2.25 (1.06,<br>4.00)      | 0.017          |
| FIV, mL;<br>median (IQR)             | 39.44<br>(11.05,101.97)   | 16.75<br>(7.87,41.76)     | 68.90 (26.03,<br>195.22)  | <0.001*        |
| ASPECTS,<br>median (IQR)             | 8.00 (6.00,<br>9.00)      | 8.00 (6.00, 8.00)         | 7.00 (6.00,<br>8.00)      | 0.643          |
| 4D CTA-CS<br>scores, median<br>(IQR) | 3.00 (2.00,<br>4.00)      | 3.00 (3.00, 4.00)         | 2.00 (1.00,<br>3.00)      | <0.001*        |
| CBS, median<br>(IQR)                 | 6.00 (3.00,<br>9.00)      | 6.50 (4.00, 9.00)         | 6.00 (1.00,<br>9.00)      | 0.641          |
| Thrombus<br>location, n (%)          |                           |                           |                           | 0.009          |
| ICA                                  | 32 (30.48)                | 24 (34.29)                | 8 (22.86)                 |                |

|                                        |                            |                            |                             |         |
|----------------------------------------|----------------------------|----------------------------|-----------------------------|---------|
| Segment M1                             | 35 (33.33)                 | 25 (35.71)                 | 10 (28.57)                  |         |
| Segment M2                             | 20 (19.05)                 | 15 (21.43)                 | 5 (14.29)                   |         |
| A1                                     | 7 (6.67)                   | 4 (5.71)                   | 3 (8.57)                    |         |
| Tandem                                 | 11 (10.48)                 | 2 (2.86)                   | 9 (25.71)                   |         |
| occlusion                              |                            |                            |                             |         |
| Laboratory                             |                            |                            |                             |         |
| parameters                             |                            |                            |                             |         |
| Glucose,<br>mmol/L; median<br>(IQR)    | 7.50 (6.20,<br>9.63)       | 8.05 (6.68,<br>10.78)      | 6.70 (5.70,<br>12.00)       | 0.017   |
| Creatinine,<br>umol/L; median<br>(IQR) | 76.00 (64.75,<br>88.25)    | 75.50 (64.00,<br>88.25)    | 79.00 (61.00,<br>105.00)    | 0.235   |
| Urea,<br>mmol/L; median<br>(IQR)       | 5.64 (4.23,<br>7.24)       | 5.33 (4.23, 6.61)          | 6.16 (3.86,<br>9.15)        | 0.958   |
| Uric acid,<br>mmol/L; median<br>(IQR)  | 324.00 (252.00,<br>409.25) | 296.00 (240.25,<br>406.25) | 315.00 (247.00,<br>419.00)  | 0.288   |
| Sodium,<br>mmol/L; median<br>(IQR)     | 140.10 (138.18,<br>142.00) | 140.55 (138.58,<br>143.00) | 139.20 (137.80,<br>141.70)  | 0.659   |
| Potassium,<br>mmol/L; median<br>(IQR)  | 4.00 (3.70,4.30)           | 4.00 (3.78, 4.20)          | 4.10 (3.80,<br>4.60)        | 0.692   |
| D-dimer;<br>median (IQR)               | 282.50 (140.50,<br>662.00) | 159.50 (74.75,<br>335.25)  | 654.00 (245.00,<br>1309.00) | 0.004   |
| Fibrinogen,<br>g/L; median<br>(IQR)    | 3.05 (2.65,<br>3.64)       | 3.06 (2.67, 3.47)          | 3.41 (2.63,<br>3.86)        | 0.966   |
| INR; median<br>(IQR)                   | 0.98 (0.92,<br>1.05)       | 0.94 (0.91, 1.01)          | 1.01 (0.94,<br>1.05)        | 0.122   |
| RBC; median<br>(IQR)                   | 4.40 (3.92,<br>4.85)       | 4.67 (4.04, 4.95)          | 4.38 (3.73,<br>4.63)        | 0.049   |
| WBC; median<br>(IQR)                   | 8.04<br>(6.35,10.21)       | 8.09 (6.39, 9.01)          | 10.13 (7.04,<br>11.93)      | 0.010   |
| BNP, median<br>(IQR)                   | 212.31 (59.87,<br>477.26)  | 48.47 (20.72,<br>130.56)   | 207.72 (112.93,<br>338.79)  | <0.001* |
| Time, min; median<br>(IQR)             |                            |                            |                             |         |
| Onset to<br>imaging                    | 251.00 (138.25,<br>449.75) | 312.50 (188.75,<br>595.50) | 252.00 (167.00,<br>511.00)  | 0.484   |
| Imaging to<br>puncture                 | 76.50 (56.75,<br>106.00)   | 84.50 (62.50,<br>106.75)   | 74.00 (53.00,<br>112.00)    | 0.532   |

|                            |                       |                       |                        |       |
|----------------------------|-----------------------|-----------------------|------------------------|-------|
| Puncture to recanalization | 81.00 (52.00, 135.75) | 90.00 (57.00, 138.50) | 128.00 (54.00, 175.00) | 0.088 |
| Recanalization, n (%)      | 91 (86.67)            | 65 (92.86)            | 26 (74.29)             | 0.014 |

---

LAA: large-artery atherosclerosis; IQR: interquartile range; NIHSS: National Institutes of Health Stroke Scale; SBP: systolic pressure; IV-Tpa: intravenous tissue type plasminogen activator; DBP: diastolic pressure; AF: atrial fibrillation; CHD: coronary heart disease; IC: ischemic core; IP: ischemic penumbra; MMR: mismatch ratio; FIV: final infarct volume; ASPECTS: Alberta Stroke Program Early CT Score; 4D CTA-CS: the modified collateral circulation scoring system on 4D CTA; CBS: clot burden score; ICA: internal carotid artery; M1: M1 segment middle cerebral artery; M2: M2 segment middle cerebral artery; A1: A1 segment anterior cerebral artery; INR: activated partial thromboplastin time; RBC: red blood cell; WBC: white blood cell; BNP: B-type brain natriuretic peptide
