# Supplementary material for: Collateral Circulation and BNP in Predicting Outcome of Acute Ischemic Stroke Patients with Atherosclerotic versus Cardioembolic Cerebral Large-Vessel Occlusion Who Underwent Endovascular Treatment
Source: MDPI journal article supplement (doi:10.3390/brainsci13040539), 2023-03-24
Supplement: s1 [file s1]

**Figure S1. mRS scores at 3 month by 4D CTA in all patients, LAA stroke patients and CE stroke patients**

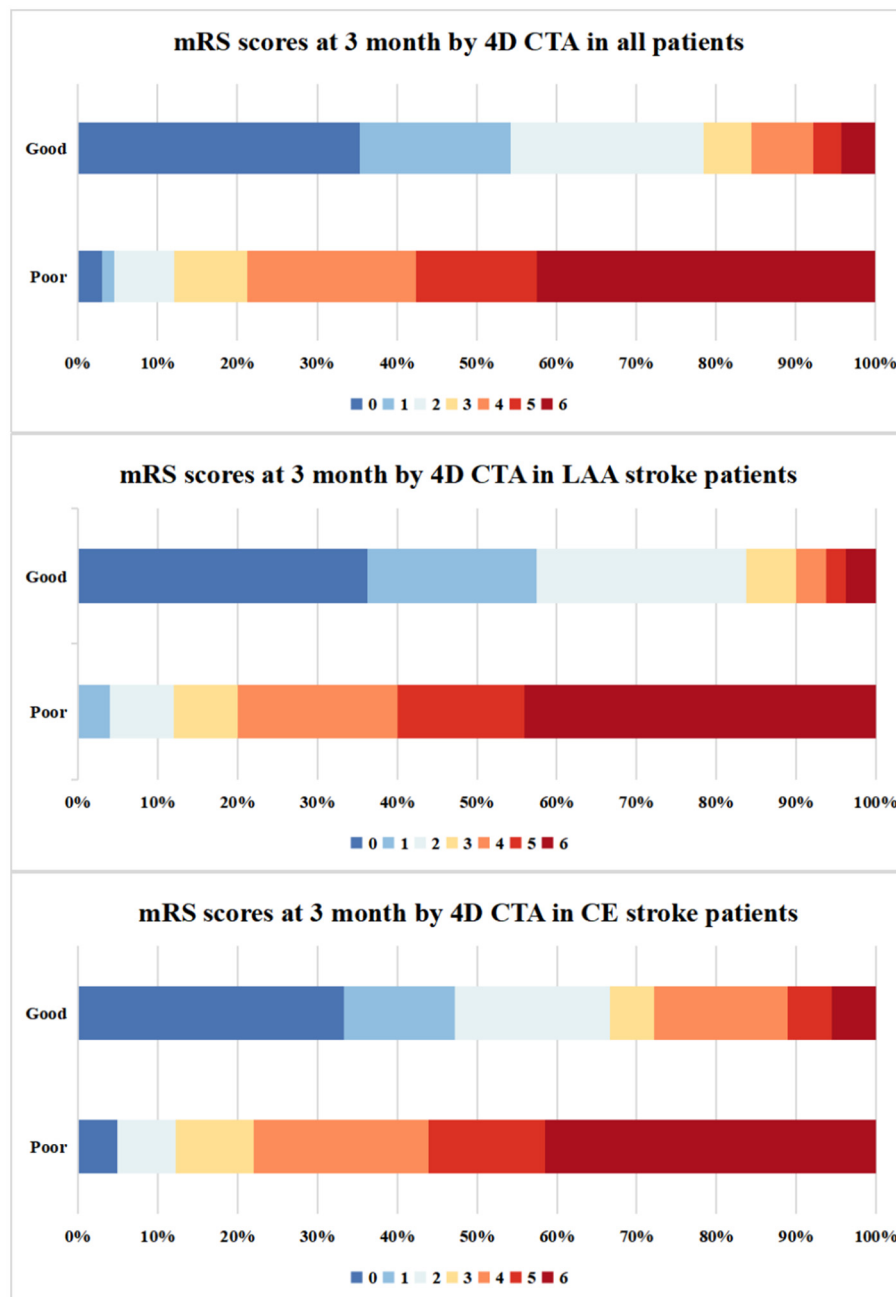

Clinical outcome (modified Rankin scale score at 3 months) in all patients group, LAA stroke group and CE stroke group, stratified by collateral status, including good collateral group (4D CTA-CS score 3-4) and poor collateral group (4D CTA-CS score 0-2).

**Figure S2. mRS scores at 3 month by BNP in all patients and CE stroke patients**

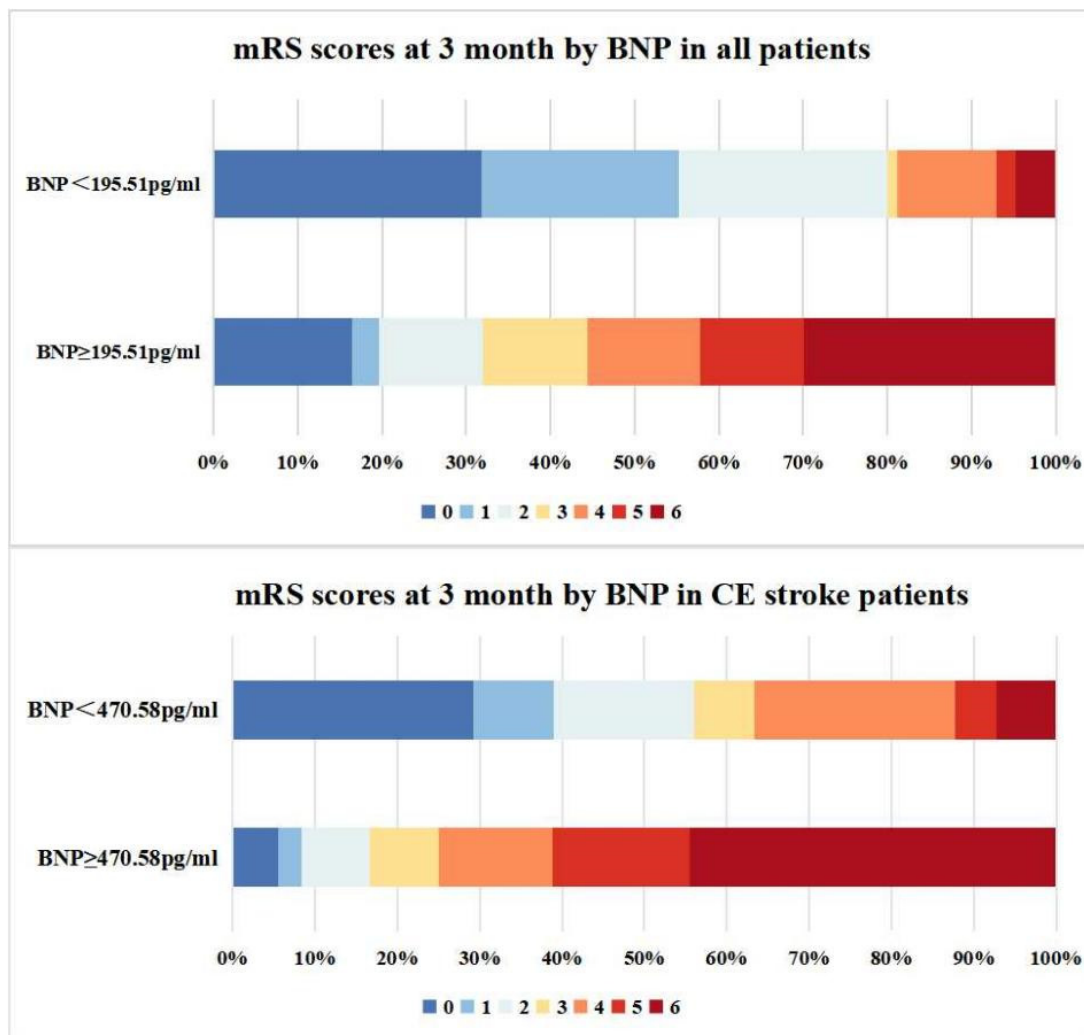

Clinical outcome (modified Rankin scale score at 3 months) in the 2 groups, all patients group and CE stroke group, stratified by the different cut-off value of serum BNP for each group.
